# Supplementary material for: Nuclei position-control and crystal growth-guidance on frozen substrates for high-performance perovskite solar cells
Source: Royal Society of Chemistry journal article supplement (doi:10.1039/c9nr02777g), 2019-01-01
Supplement: c9nr02777g1.pdf [file c9nr02777g1.pdf]

Supporting Information

**Nuclei position-control and crystal growth-guidance on frozen substrate for high performance perovskite solar cell**

Gang Wang <sup>a, b, †</sup>, Liping Liao <sup>a, b, †</sup>, Lianbin Niu <sup>c</sup>, Lijia Chen <sup>c</sup>, Wenjun Li <sup>b</sup>, Cunyun Xu <sup>a, b</sup>, Elisabeth Mbeng <sup>a, b</sup>, Yanqing Yao <sup>a, b</sup>, Debei Liu <sup>a, b</sup>, Qunliang Song <sup>a, b, \*</sup>

<sup>a</sup>Institute for Clean Energy and Advanced Materials, School of Materials and Energy, Southwest University, Chongqing 400715, P. R. China

<sup>b</sup>Chongqing Key Laboratory for Advanced Materials and Technologies of Clean Energy, Chongqing 400715, P. R. China

<sup>c</sup>College of Physics and Electronics Engineering, Chongqing Normal University, Chongqing 401331, P. R. China

<sup>†</sup> Those author contributed equally to this work.

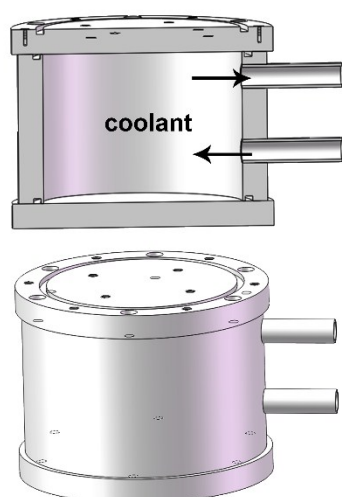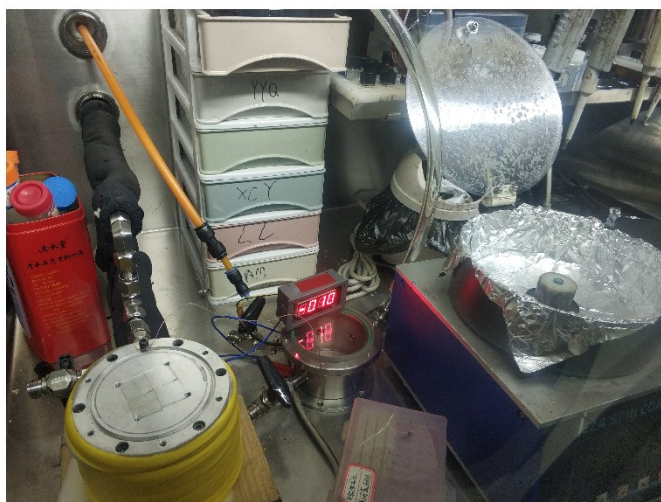

**Figure S1.** The design and the photo of the home-made cooling system for NPCG method. The cooling plate is placed near the spin coater in the same glove box.

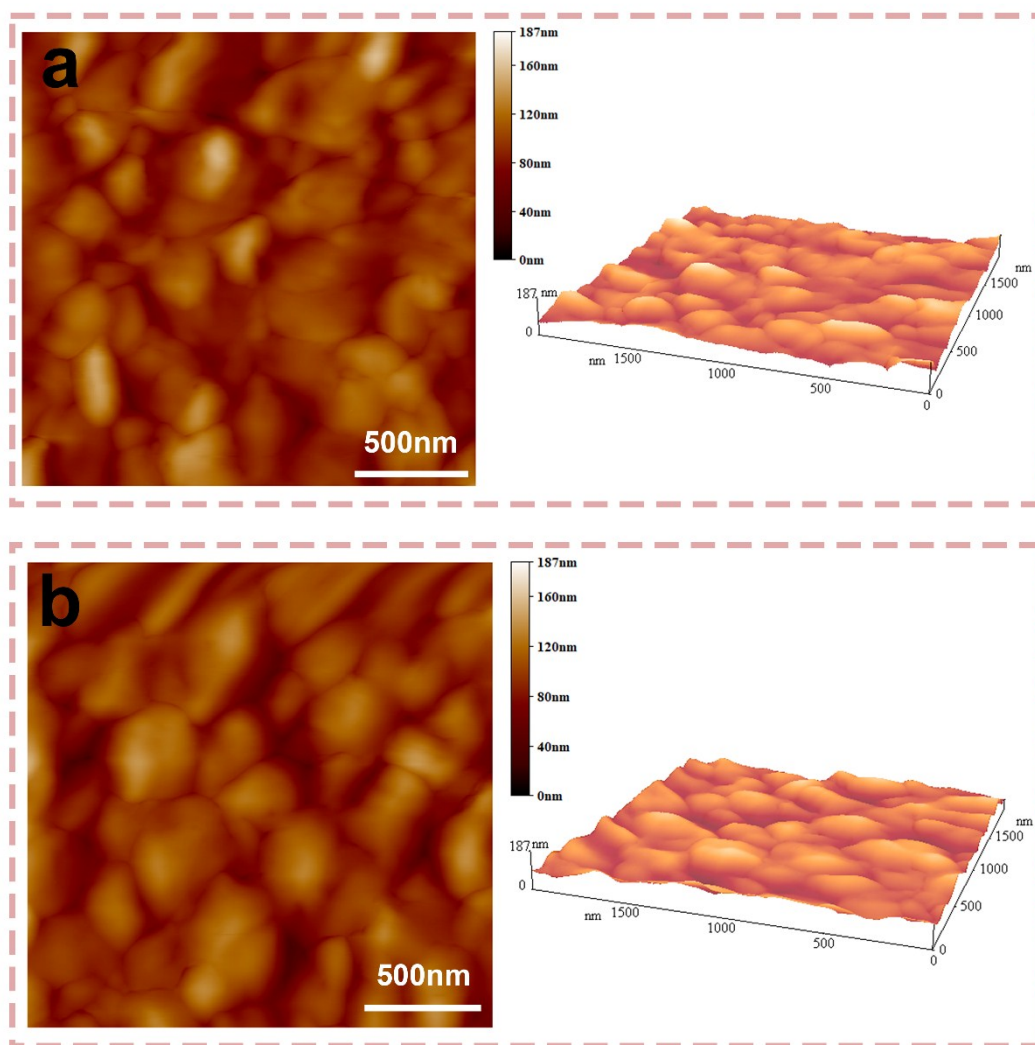

**Figure S2.** AFM images for RT (a) and NPCG@0 (b) perovskite films after thermal annealing at 85 °C for 30 minutes.

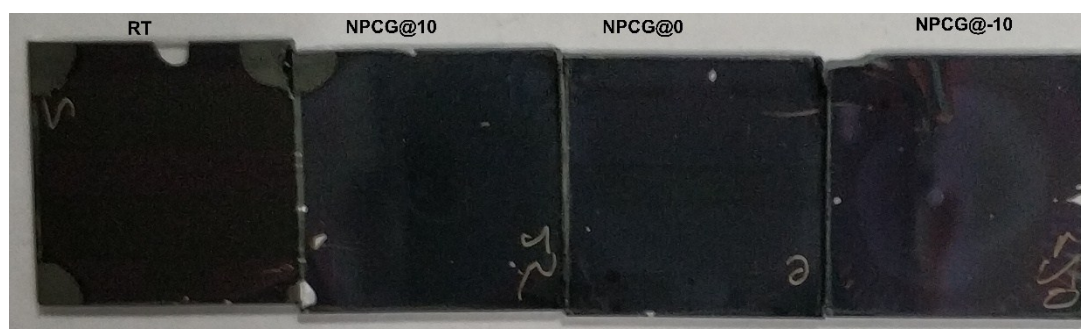

**Figure S3.** Photos of perovskite films (back) fabricated by RT and NPCG methods before depositing ETL and cathode.

**Table S1.** Photovoltaic performance of PSCs fabricated with different substrate temperatures in the same batch.

| PSCs     | $V_{oc}$ (V) | $J_{sc}$ ( $\text{mA}\cdot\text{cm}^{-2}$ ) | FF (%) | PCE (%) |
|----------|--------------|---------------------------------------------|--------|---------|
| NPCG@-10 | 1.13         | 20.11                                       | 69.03  | 15.64   |
| NPCG@0   | 1.12         | 20.22                                       | 71.21  | 16.13   |
| NPCG@10  | 1.12         | 19.89                                       | 70.83  | 15.74   |
| RT       | 1.07         | 18.78                                       | 72.33  | 14.53   |

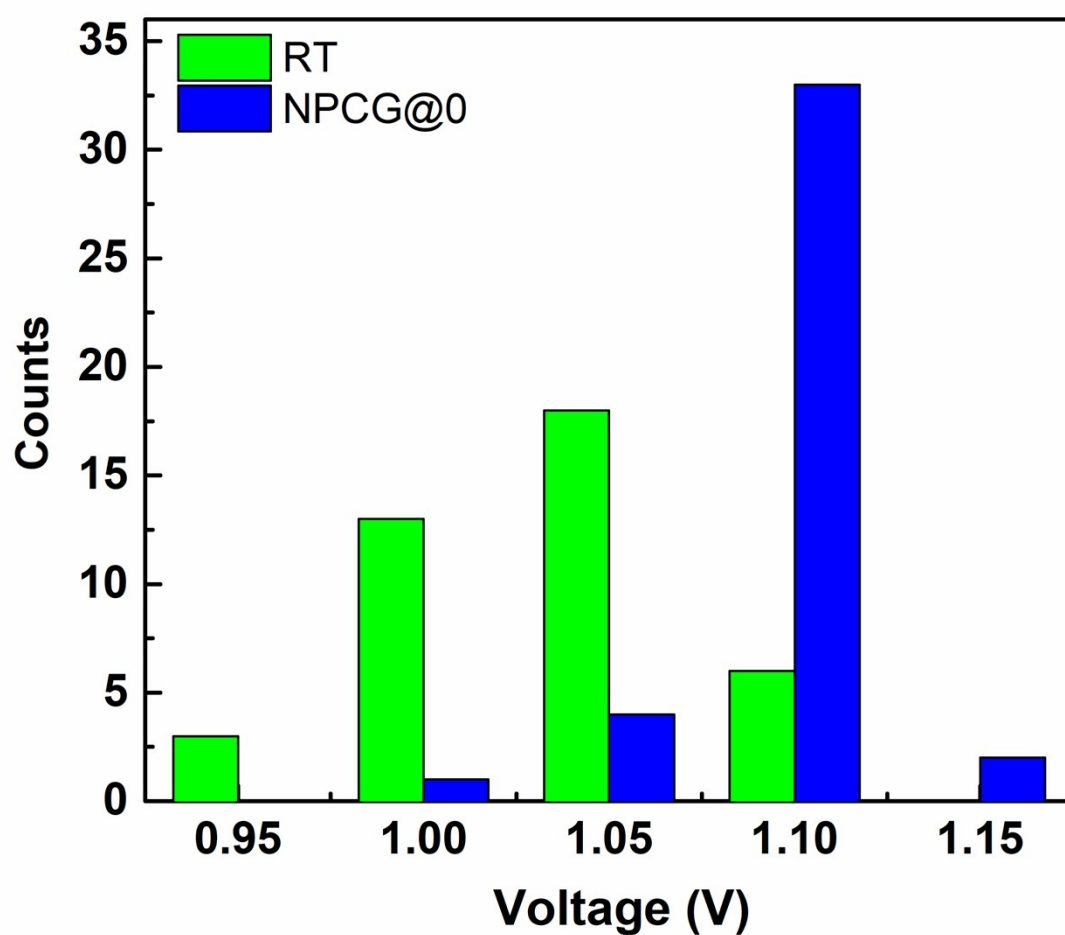

**Figure S4.** Statistical  $V_{oc}$  of 40 PSC devices for RT and NPCG@0 method respectively.

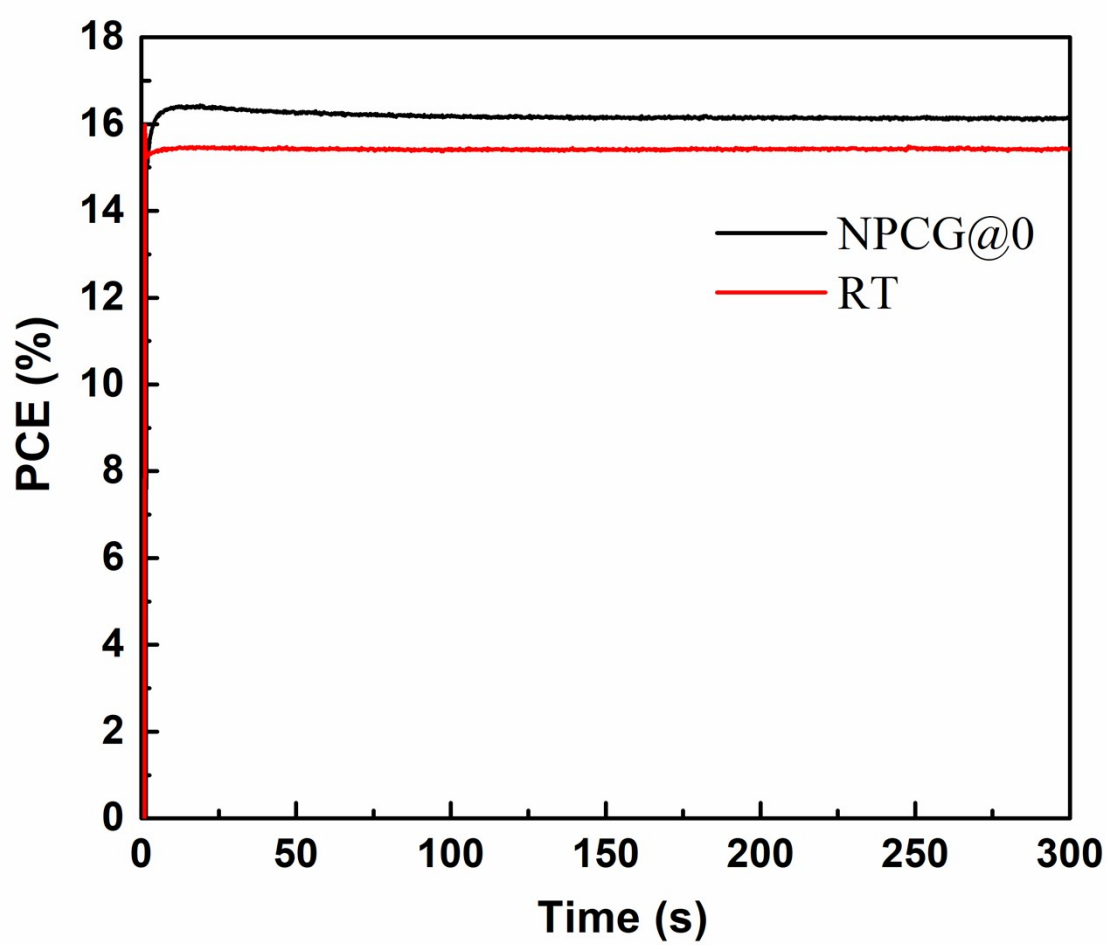

**Figure S5.** The steady output at the maximum power point for NPCG@0 and RT devices.
